# Supplementary material for: GuitarPD: A Randomized Pilot Study on the Impact of Nontraditional Guitar Instruction on Functional Movement and Well‐Being in Parkinson’s Disease
Source: Hindawi journal article supplement (doi:10.1155/2022/1061045), 2022-01-01
Supplement: f1 [file 1061045.f1.zip]

Table a: Baseline MDS-UPDRS severity scores for all participants (higher scores reflect a greater level of disability)

|                              | Symptom                           | Normal            | Slight            | Mild              | Moderate         | Severe           |
|------------------------------|-----------------------------------|-------------------|-------------------|-------------------|------------------|------------------|
| Selected MDS-UPDRS ADL Items | Hygiene                           | 11/26<br>(42.31%) | 8/26<br>(30.77%)  | 7/26<br>(26.92%)  | 0                | 0                |
|                              | Handwriting                       | 5/26<br>(19.23%)  | 6/26<br>(23.08%)  | 5/26<br>(19.23%)  | 7/26<br>(26.92%) | 3/26<br>(11.54%) |
|                              | Tremor                            | 7/26<br>(26.92%)  | 8/26<br>(30.77%)  | 5/26<br>(19.23%)  | 6/26<br>(23.08%) | 0                |
| MDS-UPDRS Rigidity Items     | Rigidity – neck                   | 1/26<br>(3.85%)   | 10/26<br>(38.46%) | 10/26<br>(38.46%) | 3/26<br>(11.54%) | 4/26<br>(15.39%) |
|                              | Rigidity – Right Upper Extremity  | 6/26<br>(23.08%)  | 8/26<br>(30.77%)  | 12/26<br>(46.15%) | 0                | 0                |
|                              | Rigidity – Left Upper Extremity   | 7/26<br>(26.92%)  | 8/26<br>(30.77%)  | 10/26<br>(38.46%) | 1/26<br>(3.85%)  | 0                |
|                              | Rigidity – Right Lower Extremity  | 7/26<br>(26.92%)  | 6/26<br>(23.08%)  | 11/26<br>(42.31%) | 2/26<br>(7.69%)  | 0                |
|                              | Rigidity – Left Lower Extremity   | 6/26<br>(23.08%)  | 3/26<br>(11.54%)  | 13/26<br>(50%)    | 4/26<br>(15.39%) | 0                |
| MDS-UPDRS Agility Items      | Finger tapping – Right Hand       | 2/26<br>(7.69%)   | 8/26<br>(30.77%)  | 9/26<br>(34.62%)  | 7/26<br>(26.92%) | 0                |
|                              | Finger tapping – Left Hand        | 0                 | 4/26<br>(15.39%)  | 13/26<br>(50%)    | 8/26<br>(30.77%) | 0                |
|                              | Hand movements - Right Hand       | 4/26<br>(15.39%)  | 8/26<br>(30.77%)  | 11/26<br>(42.31%) | 3/26<br>(11.54%) | 0                |
|                              | Hand movements - Left Hand        | 0                 | 10/26<br>(38.46%) | 9/26<br>(34.62%)  | 7/26<br>(26.92%) | 0                |
|                              | Pronation-Supination - Right Hand | 3/26<br>(11.54%)  | 10/26<br>(38.46%) | 8/26<br>(30.77%)  | 5/26<br>(19.23%) | 0                |
|                              | Pronation-Supination -            | 1/26<br>(3.85%)   | 5/26<br>(19.23%)  | 13/26<br>(50%)    | 7/26<br>(26.92%) | 0                |

|                               |                                               |                   |                   |                  |                  |                 |
|-------------------------------|-----------------------------------------------|-------------------|-------------------|------------------|------------------|-----------------|
| Left Hand                     |                                               |                   |                   |                  |                  |                 |
| Toe Tapping – Right foot      | 3/26<br>(11.54%)                              | 9/26<br>(34.62%)  | 8/26<br>(30.77%)  | 5/26<br>(19.23%) | 1/26<br>(3.85%)  |                 |
| Toe Tapping – Left foot       | 1/26<br>(3.85%)                               | 9/26<br>(34.62%)  | 8/26<br>(30.77%)  | 6/26<br>(23.08%) | 2/26<br>(7.69%)  |                 |
| Leg Agility – Right leg       | 10/26<br>(38.46%)                             | 4/26<br>(15.39%)  | 10/26<br>(38.46%) | 2/26<br>(7.69%)  | 0                |                 |
| Leg Agility – Left leg        | 5/26<br>(19.23%)                              | 10/26<br>(38.46%) | 7/26<br>(26.92%)  | 4/26<br>(15.39%) | 0                |                 |
| MDS-UPDRS Mobility/Gait Items | Arising from chair                            | 18/26<br>(69.23%) | 5/26<br>(19.23%)  | 2/26<br>(7.69%)  | 1/26<br>(3.85%)  | 0               |
|                               | Gait                                          | 6/26<br>(23.08%)  | 13/26<br>(50%)    | 4/26<br>(15.39%) | 3/26<br>(11.54%) | 0               |
|                               | Freezing of Gait                              | 25/26<br>(96.15%) | 0                 | 1/26<br>(3.85%)  | 0                | 0               |
|                               | Postural Stability                            | 22/26<br>(84.62%) | 2/26<br>(7.69%)   | 1/26<br>(3.85%)  | 1/26<br>(3.85%)  | 0               |
|                               | Posture                                       | 6/26<br>(23.08%)  | 13/26<br>(50%)    | 4/26<br>(15.39%) | 3/26<br>(11.54%) | 0               |
|                               | Global spontaneity of movement                | 7/26<br>(26.92%)  | 12/26<br>(46.15%) | 4/26<br>(15.39%) | 3/26<br>(11.54%) | 0               |
|                               |                                               |                   |                   |                  |                  |                 |
| MDS-UPDRS Tremor items        | Postural tremor – right hand                  | 12/26<br>(46.15%) | 12/26<br>(46.15%) | 2/26<br>(7.69%)  | 0                | 0               |
|                               | Postural tremor – left hand                   | 9/26<br>(34.62%)  | 13/26<br>(50%)    | 4/26<br>(15.39%) | 0                | 0               |
|                               | Kinetic tremor – right hand                   | 10/26<br>(38.46%) | 12/26<br>(46.15%) | 4/26<br>(15.39%) | 0                | 0               |
|                               | Kinetic tremor – left hand                    | 3/26<br>(11.54%)  | 14/26<br>(53.85%) | 9/26<br>(34.62%) | 0                | 0               |
|                               | Rest tremor amplitude – right upper extremity | 11/26<br>(42.31%) | 6/26<br>(23.08%)  | 7/26<br>(26.92%) | 1/26<br>(3.85%)  | 1/26<br>(3.85%) |
|                               | Rest tremor amplitude – left upper extremity  | 16/26<br>(61.54%) | 5/26<br>(19.23%)  | 3/26<br>(11.54%) | 2/26<br>(7.69%)  | 0               |
|                               | Rest tremor                                   | 21/26             | 4/26              | 1/26             | 0                | 0               |

|                                                    |                   |                  |                  |                  |                 |
|----------------------------------------------------|-------------------|------------------|------------------|------------------|-----------------|
| amplitude –<br>right lower<br>extremity            | (80.77%)          | (15.39%)         | (3.85%)          |                  |                 |
| Rest tremor<br>amplitude – left<br>lower extremity | 24/26<br>(92.31%) | 2/26<br>(7.69%)  | 0                | 0                | 0               |
| Rest tremor<br>amplitude –<br>lip/jaw              | 23/26<br>(88.46%) | 2/26<br>(7.69%)  | 0                | 1/26<br>(3.85%)  | 0               |
| Constancy of<br>rest tremor                        | 8/26<br>(30.77%)  | 8/26<br>(30.77%) | 6/26<br>(23.08%) | 3/26<br>(11.54%) | 1/26<br>(3.85%) |

Table b: Q-DASH – scores range from 0-100, with higher scores indicating greater disability

|        | <b>Score: 0-20</b> | <b>Score: 21-40</b> | <b>Score: 41-60</b> | <b>Score: 61-80</b> | <b>Score: 81-100</b> |
|--------|--------------------|---------------------|---------------------|---------------------|----------------------|
| Q-DASH | 19/26<br>(73.08%)  | 3/26<br>(11.54%)    | 4/26<br>(15.39%)    | 0                   | 0                    |

Table c: NeuroQoL: raw scores range from 8-40 with lower scores indicating greater disability. T-scores have a mean of 50 and SD of 10 with lower scores indicating greater disability

| <b>T-score</b>                  | <b>T-Score: 20-29</b> | <b>T-Score: 30-39</b> | <b>T-Score: 40-49</b> | <b>T-Score: 50-60</b> |
|---------------------------------|-----------------------|-----------------------|-----------------------|-----------------------|
| Neuro-QoL<br>Upper Extremity    | 2/26<br>(7.69%)       | 11/26<br>(42.31%)     | 7/26<br>(26.92%)      | 6/26<br>(23.08%)      |
| Neuro-QoL<br>Lower<br>Extremity | 0                     | 9/26                  | 11/26<br>(42.31%)     | 6/26<br>(23.08%)      |

Table d: Baseline Parkinson's Disease Questionnaire-39 Results

*NB: Higher scores reflect greater disability.*

| PDQ-39               | Minimum Score | Maximum Score | Mean Score |
|----------------------|---------------|---------------|------------|
| Mobility             | 0             | 30            | 10.19      |
| Adaptive Living      | 0             | 16            | 5.58       |
| Emotional Well-Being | 0             | 14            | 5.27       |
| Stigma               | 0             | 13            | 1.73       |
| Social Support       | 0             | 5             | 1.77       |
| Cognition            | 0             | 12            | 5.04       |
| Communication        | 0             | 8             | 2.88       |
| Bodily Discomfort    | 1             | 12            | 5.00       |
| Total                | 6             | 83            | 37.46      |
