# Supplementary material for: GuitarPD: A Randomized Pilot Study on the Impact of Nontraditional Guitar Instruction on Functional Movement and Well-Being in Parkinson's Disease
Source: Parkinsons Dis. 2022 Jun 25;2022:1061045. doi: 10.1155/2022/1061045 (PMC9252755; doi:10.1155/2022/1061045)
Supplement: Supplementary Materials — 1. Supplementary_File1: Curriculum description and Score example. 2. Supplementray_File2: A. Table 5: Comparison of motor and emotion outcomes between the time of randomization (Baseline) and the initiation of the guitar lessons (Week 6) for the delayed start group. B. Table 6: Compiled results of participant exit questionnaires. 3. Supplementary_File3: A. Baseline Characteristics of MDS-UPDRS, Q-DASH, NeuroQoL, and PDQ-39 (Table a–d). [file 1061045.f1.zip]

Archive with 3 entries (3 files):
- 1061045.f1/Guitar_PD_Supplementary_File1_Curriculum description and score example.pdf
- 1061045.f1/Guitar_PD_Supplementary_File2_Table 5 and Table 6.pdf
- 1061045.f1/Guitar_PD_Supplementary_File3_Baseline Characteristics_revised.pdf
